# Supplementary material for: SIRT1 prevents cigarette smoking-induced lung fibroblasts activation by regulating mitochondrial oxidative stress and lipid metabolism
Source: PubMed Central journal article supplement (PMC9107262; doi:10.1186/s12967-022-03408-5), 2022-05-14

Fig 1

C

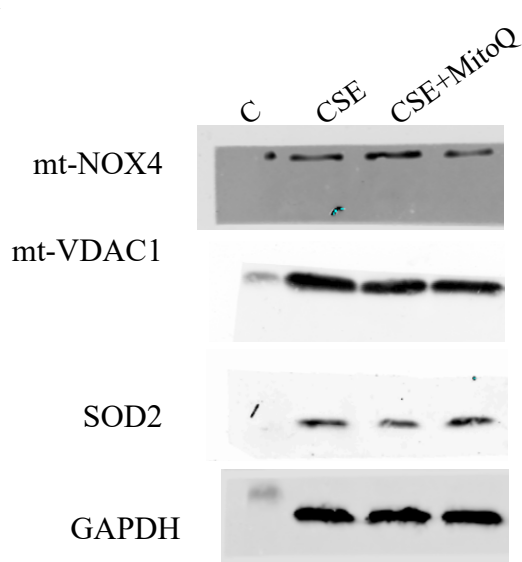

D

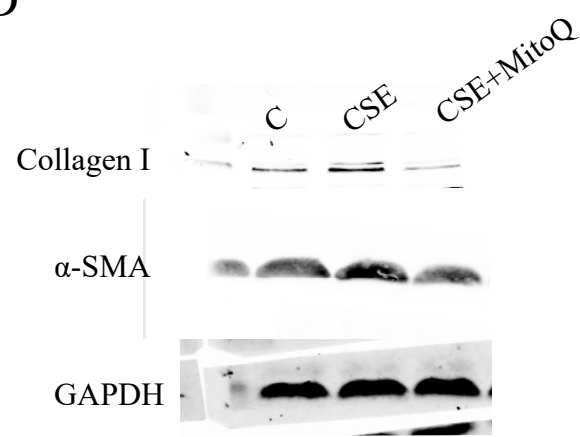

Fig 2

A

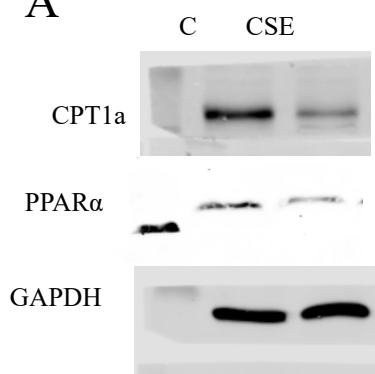

C

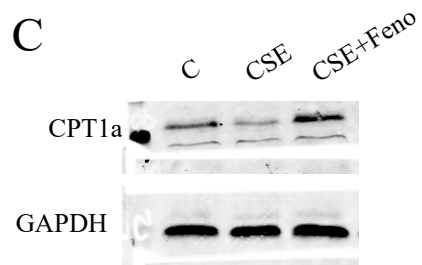

D

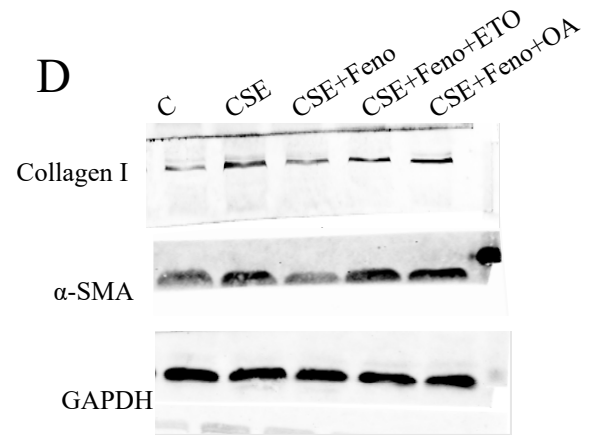

E

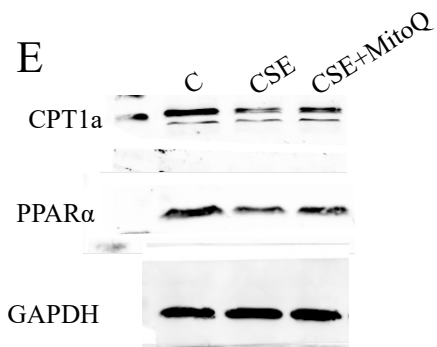

G

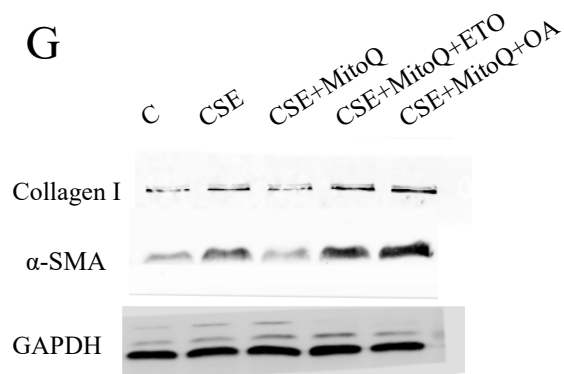

**Fig 3**

**C**

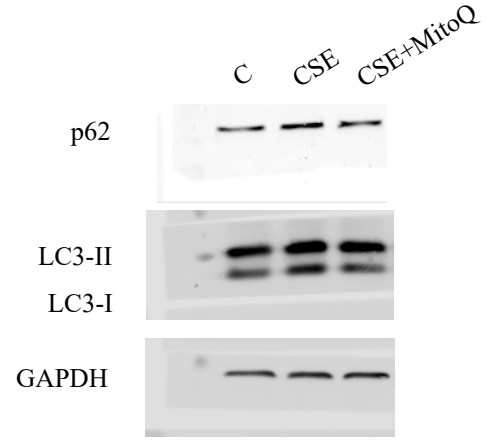

**E**

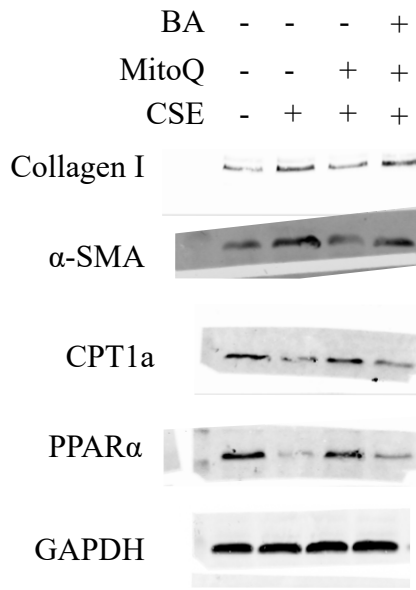

**G**

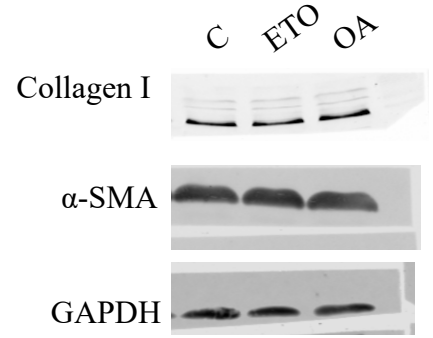

**K**

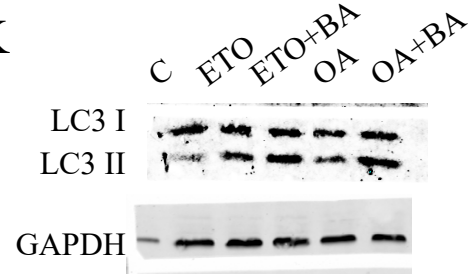

**Fig 4**

**A**

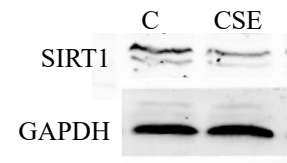

**B**

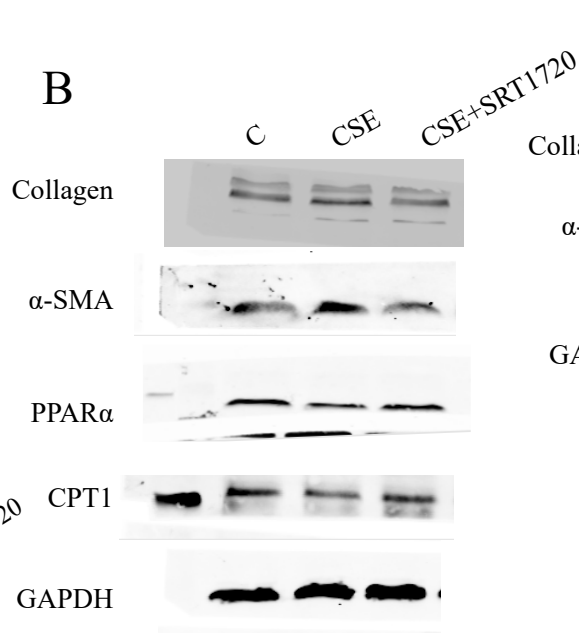

**F**

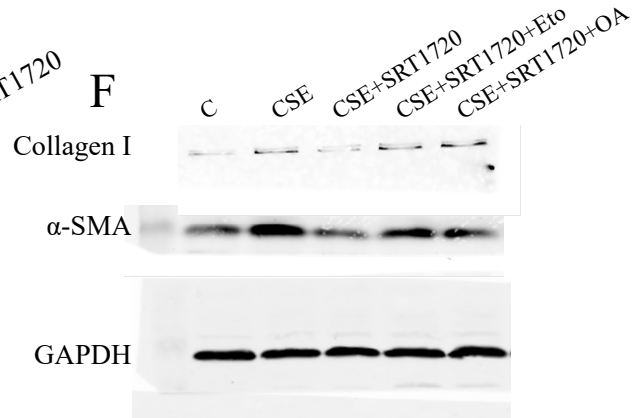

**G**

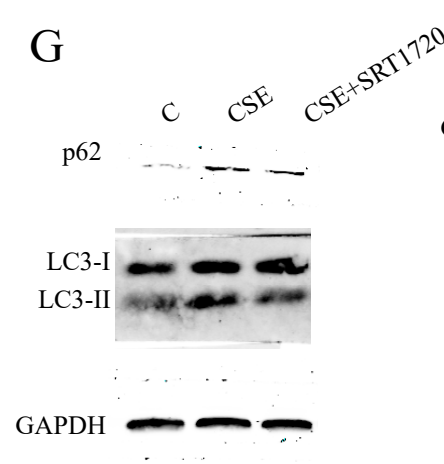

**I**

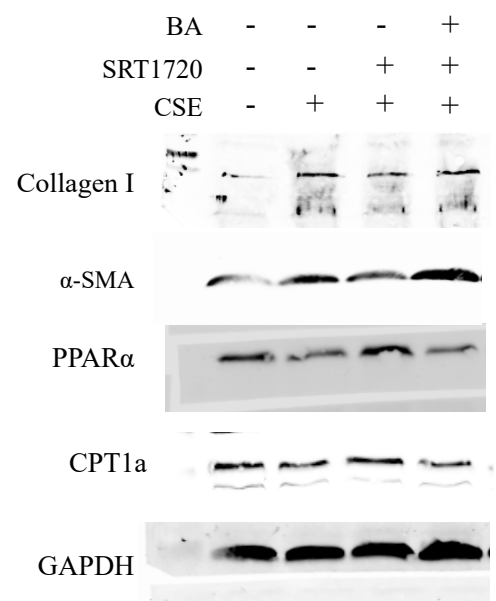

Fig5

A

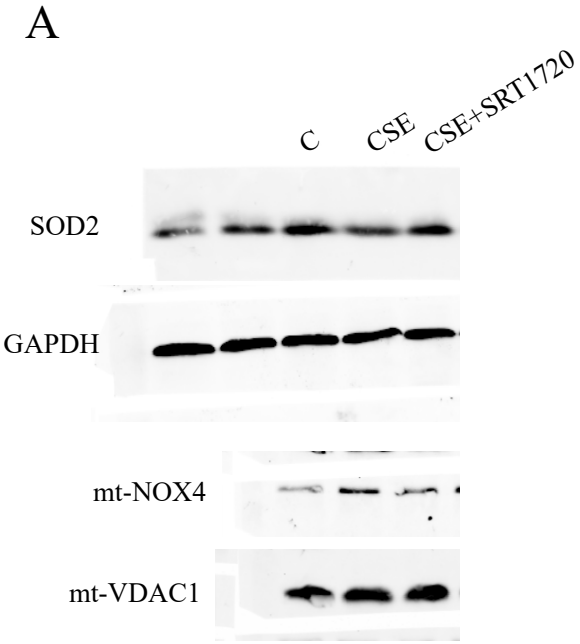

D

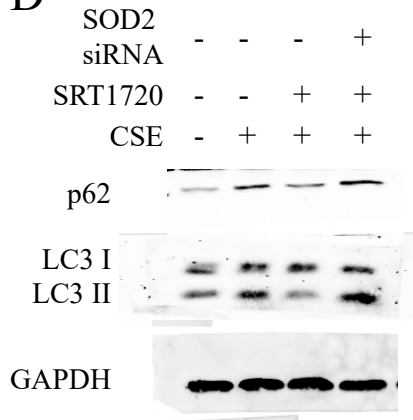

H

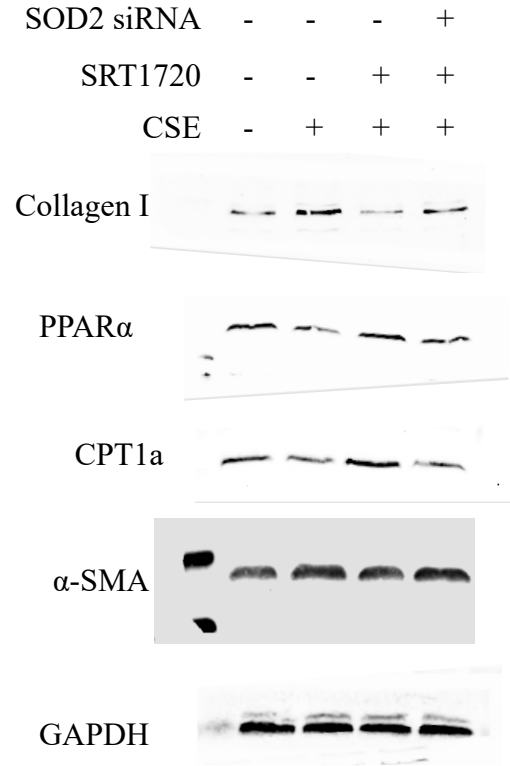

Supplement: 12967_2022_3408_MOESM1_ESM.pdf [file 12967_2022_3408_MOESM1_ESM.pdf]
