# Supplementary material for: SIRT1 prevents cigarette smoking-induced lung fibroblasts activation by regulating mitochondrial oxidative stress and lipid metabolism
Source: PubMed Central journal article supplement (PMC9107262; doi:10.1186/s12967-022-03408-5), 2022-05-14
Supplement: 12967_2022_3408_MOESM2_ESM.pdf [file 12967_2022_3408_MOESM2_ESM.pdf]

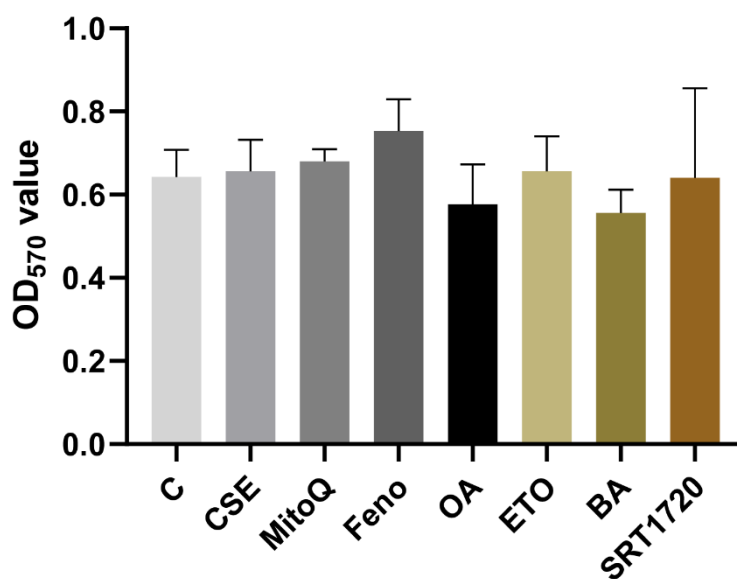

**MTT test for compounds used to treat cells.** Cells were treated as indicated and their concentrations were showed in Materials and Methods section. Then, MTT tests were performed following manufacture's instruction (Beyond, Shanghai, China). CSE, cigarette smoke extract; MitoQ, mitoquinone; Feno, fenofibrate; OA, oleic acid; ETO, etomoxir; BA, bafilomycin.
